# Supplementary material
Source: publisher figshare collection journal article supplement (https://acs.figshare.com/ndownloader/files/4023880)
Supplement: Supplementary file 1 [file 4023880]

**Exploring the Structure of Paramagnetic Centers in SBA-15 Supported Vanadia Catalysts With Pulsed One- and Two-dimensional Electron Paramagnetic Resonance (EPR) and Electron Nuclear Double Resonance (ENDOR)**

A. Dinse<sup>a,b)</sup>, T. Wolfram<sup>c)</sup>, C. Carrero<sup>a)</sup>, R. Schlögl<sup>c)</sup>, R. Schomäcker<sup>a)</sup>, and K.-P. Dinse<sup>d)\*</sup>

- a) Department of Chemistry, TU Berlin, Strasse des 17. Juni 124, D-10623 Berlin, Germany
- b) present address: BP Products North America, Naperville, IL 60503, USA, 150, West Warrenfield Rd.
- c) Department of Inorganic Chemistry, Fritz-Haber-Institute of the Max-Planck-Society, Faradaystrasse 4-6, D-14195 Berlin, Germany
- d) Department of Physics, FU Berlin, Arnimallee 14, D-14195 Berlin, Germany  
Fax: (+)49-30-8385-6046  
E-mail: [dinse@physik.fu-berlin.de](mailto:dinse@physik.fu-berlin.de)

## Supporting information

Simulation frequencies were chosen according to the observed positions of vanadium signals in the 2D plot. Experimental intensities were determined by projecting the 2D plot onto the  $T_1$  related axis. Experimental data shown were obtained using the  $H_2$  reduced sample with 1.8 wt. % V (2V/SBA-15).

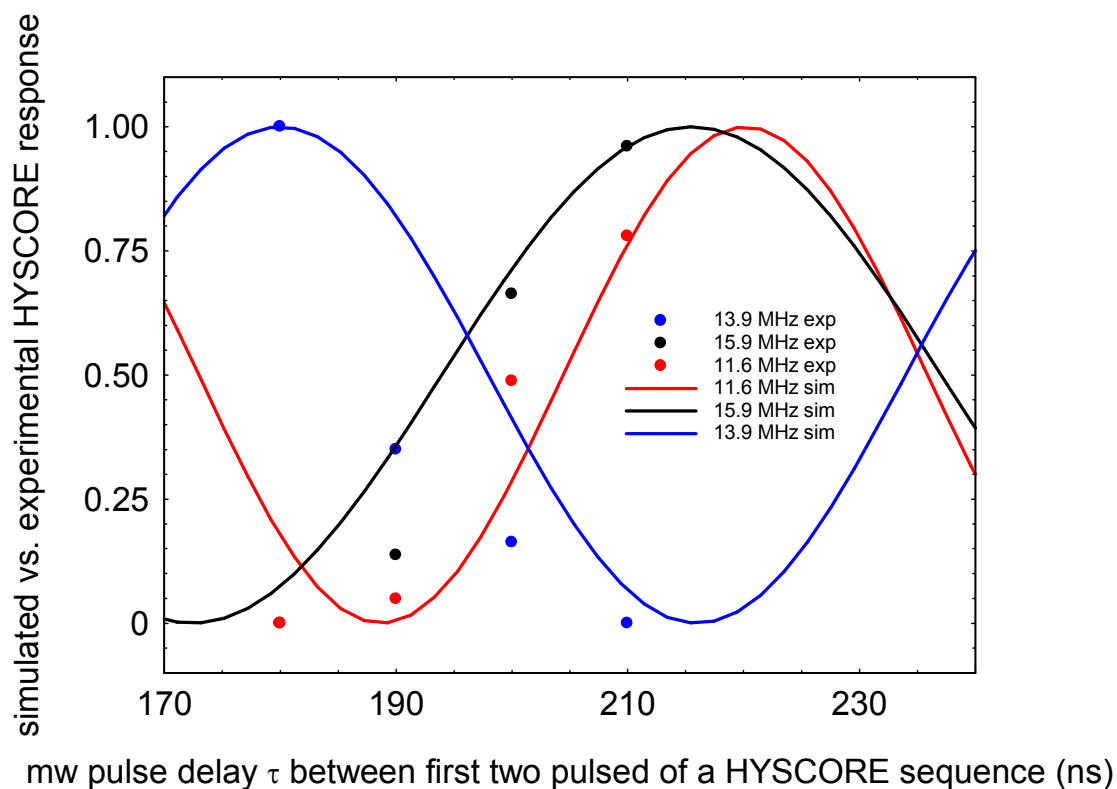

Fig. S1: Simulated and experimental HYSCORE response as function of the delay time  $\tau$  of the first pulses of a HYSCORE sequence.

For comparing the relative signal intensities of “free” and “coupled” peaks in samples of different vanadia loading as shown in Fig. 10, a pulse delay  $\tau = 200$  ns was chosen. Although the center peak is depressed significantly under this condition, the difference in relative intensities can be observed for all three samples.

In order to obtain a qualitative measure of the relative contribution of “local” and “distant” vanadium atoms, the intensity of projected 2D peaks is summed for the 4 delay values shown in Fig. S2. Because the range of  $\tau$  values covers the conditions from “full” sensitivity to total suppression, a rough guess of the undistorted relative intensities can be obtained. For the  $H_2$  reduced sample with 1.8 wt. % vanadium loading the intensity values are 8.1/13/7.7 (with increasing frequency), thus indicating that oligomeric and monomeric sites are visible in similar amounts.

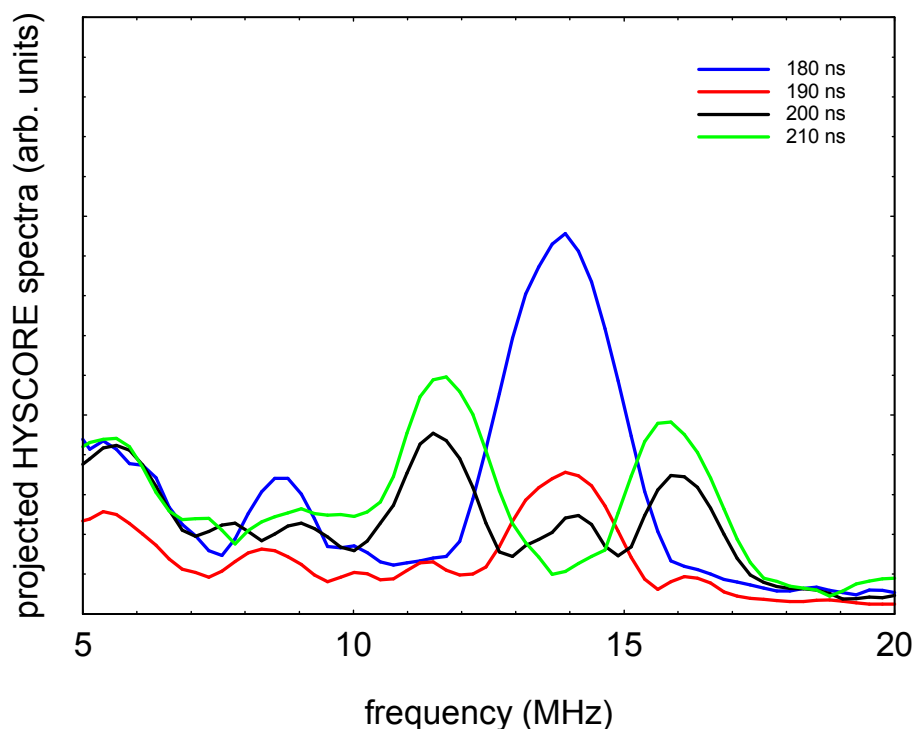

Fig. S2: 34 GHz projected HYSCORE data of SBA-15 supported  $\text{VO}_x$  catalysts with 1.8 wt. % vanadium loading (2V/SBA-15,  $\text{H}_2$  reduced, sealed),  $T = 10$  K, showing the effect of variation of time delay of the first two mw pulses in a 4-pulse HYSCORE sequence.

Sample properties are compiled in Table S1.

| sample name | FHI serial number | V [wt%] XRF | V [mmol/g] | S(BET) [ $\text{m}^2/\text{g}$ ] | V surface density [ $\text{nm}^{-2}$ ] | V surface density [ $\text{nm}^{-2}$ ] |
|-------------|-------------------|-------------|------------|----------------------------------|----------------------------------------|----------------------------------------|
| SBA-15      | 7724              | 0           | 0          | 987                              | 0                                      | 0                                      |
| 1V/SBA-15   | 7779              | 0.99        | 0.19       | 939                              | 0.125                                  | 0.119                                  |
| 2V/SBA-15   | 7802              | 1.77        | 0.35       | 926                              | 0.226                                  | 0.212                                  |
| 3.5V/SBA-15 | 7815              | 3.45        | 0.68       | 807                              | 0.505                                  | 0.413                                  |
| 6.5V/SBA-15 | 7817              | 6.34        | 1.24       | 679                              | 1.103                                  | 0.759                                  |
| 9V/SBA-15   | 7827              | 9.15        | 1.80       | 529                              | 2.045                                  | 1.096                                  |

Table S1: Vanadium surface densities are calculated using either specific surface area of the parent SBA-15 support (outmost column) or using the surface area of samples (5<sup>th</sup> column) after grafting, respectively.

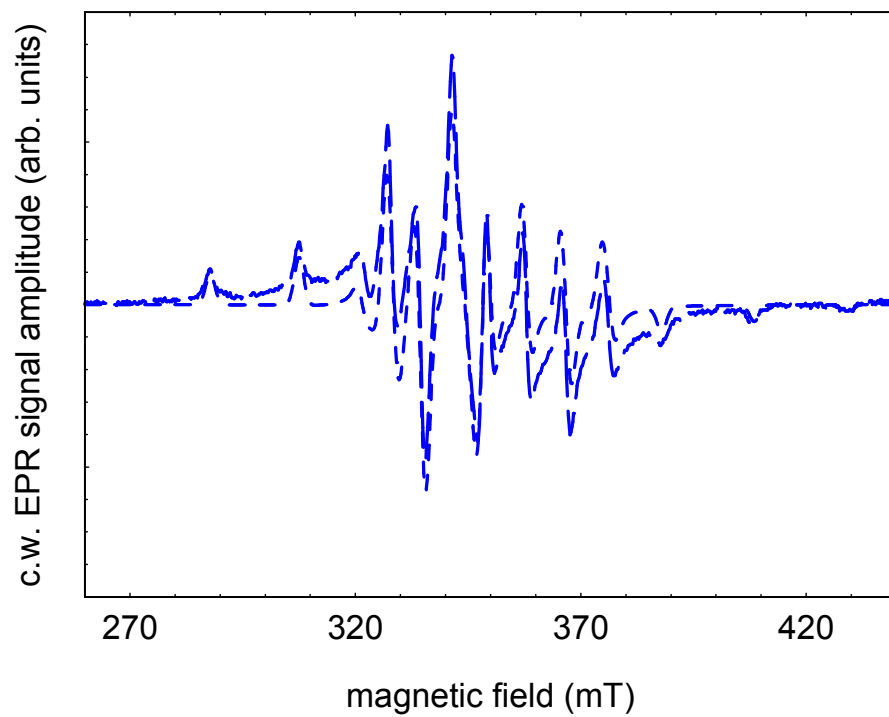

Fig. S3: C. w. EPR spectrum of sample with 6.3 wt % V (6.5V/SBA-15, as prepared) measured at 80 K. Dashed line is a best fit using the following parameters:  $g = (1.9859 \ 1.9895 \ 1.0415)$ ,  $A = (197.0 \ 217.6 \ 548.7)$  MHz, line width 2.4 mT.
